# Supplementary material for: Magnetic behavior of tetrakis[4-(N-tert-butyl-N-oxylamino)pyridine]bis(isocyanato-N)cobalt(ii) in frozen solution
Source: Royal Society of Chemistry journal article supplement (doi:10.1039/b403524k), 2004-01-01

# Supplementary Information

Magnetic Behavior of Tetrakis[4-(*N*-*tert*-butyl-*N*-oxylamino)pyridine]bis(isocyanato-*N*)cobalt(II) in Frozen Solution

*Shinji Kanegawa,a Satoru Karasawa, a Motohiro Nakano,b and Noboru Koga**

Table of Contents

1. Figure S1. UV-Vis Spectra change for [Co(OCN)2(**4NOPy**)4] in MTHF solution in the temperature range of 295–160 K
2. Figure S2. *T* vs. *T* plots of [Co(OCN)2(**4NOPy**)4] in microcrystalline state and frozen solution
3. Figure S3. *’* vs. *”* plot (Cole-Cole diagram) for [Co(OCN)2(**4NOPy**)4] in the frozen MTHF solution.
4. Figure S4. *Mmol*/*NB* vs. *H/T* plot of [Co(OCN)2(**4NOPy**)4] in a frozen MTHF solution
5. Figure S5. a) *’T* - vs. *T* and b) **” vs. *T* plots for [Co(SCN)2(**4NOPy**)4] in a frozen MTHF solution

Figure S1. UV-Vis Spectra change for [Co(OCN)2(**4NOPy**)4] in MTHF solution in the temperature range of 295 – 160 K. The dot line in the inset shows the spectrum for the solid sample and the perpendicular axis is arbitrary unit.

The spectra at 300 K for [Co(OCN)2**(4NOPy)**4] showed the two sets of absorptions in visible and near-infrared regions (at 546, 584, 632, and 660 nm and at 968, 1292, and 1508 nm, respectively) due to the *d*-*d* transitions of C2v cobalt(II) complex having a tetrahedral structure. On cooling, new absorption at 470 nm gradually increased at the expense of absorptions due to tetrahedral structure. The absorptions in both regions completely disappeared and new ones at 470 and 1020 nm at 160 K. Especially, the latter absorption is characteristic to the octahedral structure due to the *d*-*d* transition . No shift of absorption was observed below 160 K (to 20 K). Temperature dependent UV-Vis spectra suggest that the equilibrium between the tetrahedral and octahedral structures for Co(II) complexes in solution leans to the former at room temperature and shifted to the latter on cooling. In measurements of UV-Vis spectra of the solid-state sample ( or in KBr pellet), the weak absorption at ~1020 nm observed in the solution sample at 160 K was detected at ~1060 nm as a peak (see the inset of Figure S1).


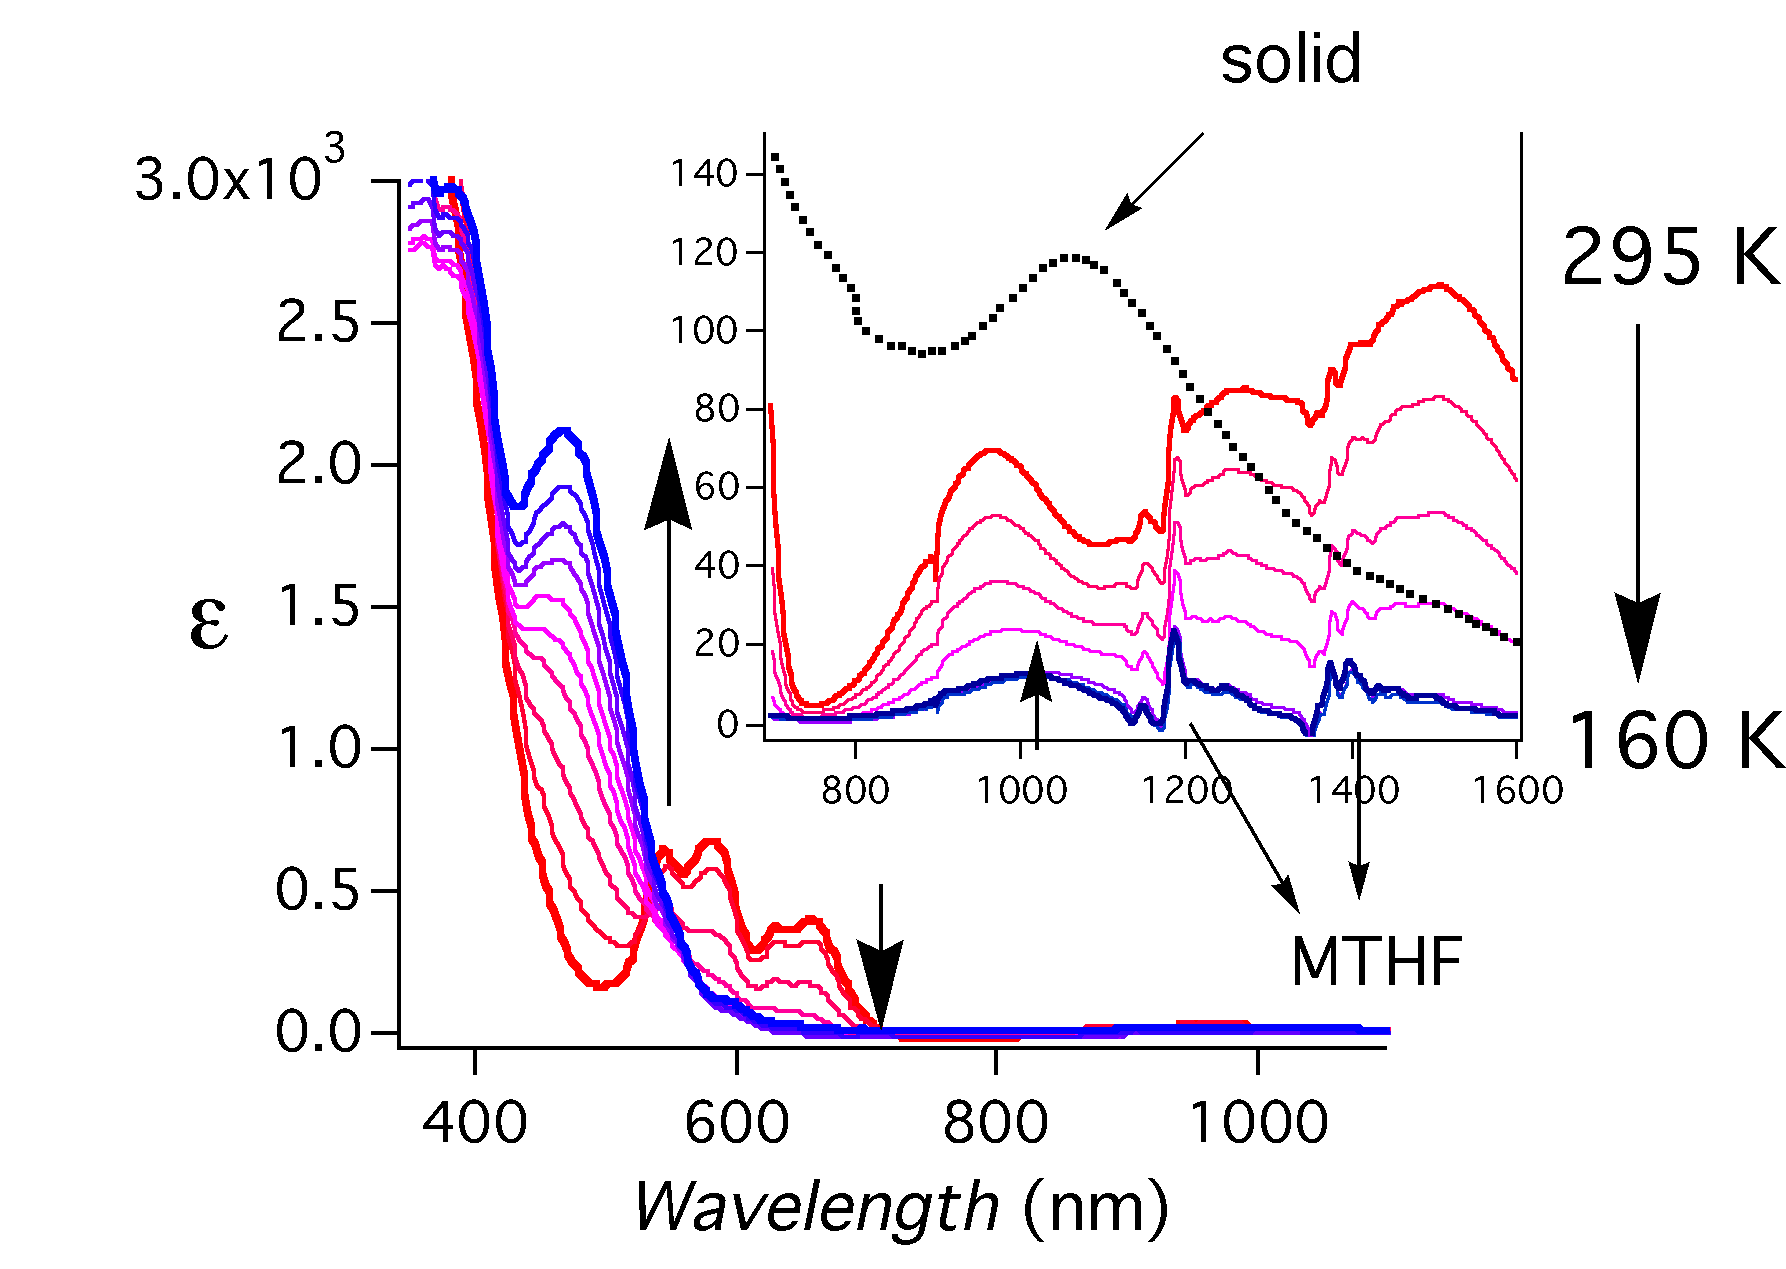


Figure S2. *T* vs. *T* plots of [Co(OCN)2(**4NOPy**)4] in microcrystalline state (filled circle) and frozen solution (open circle)


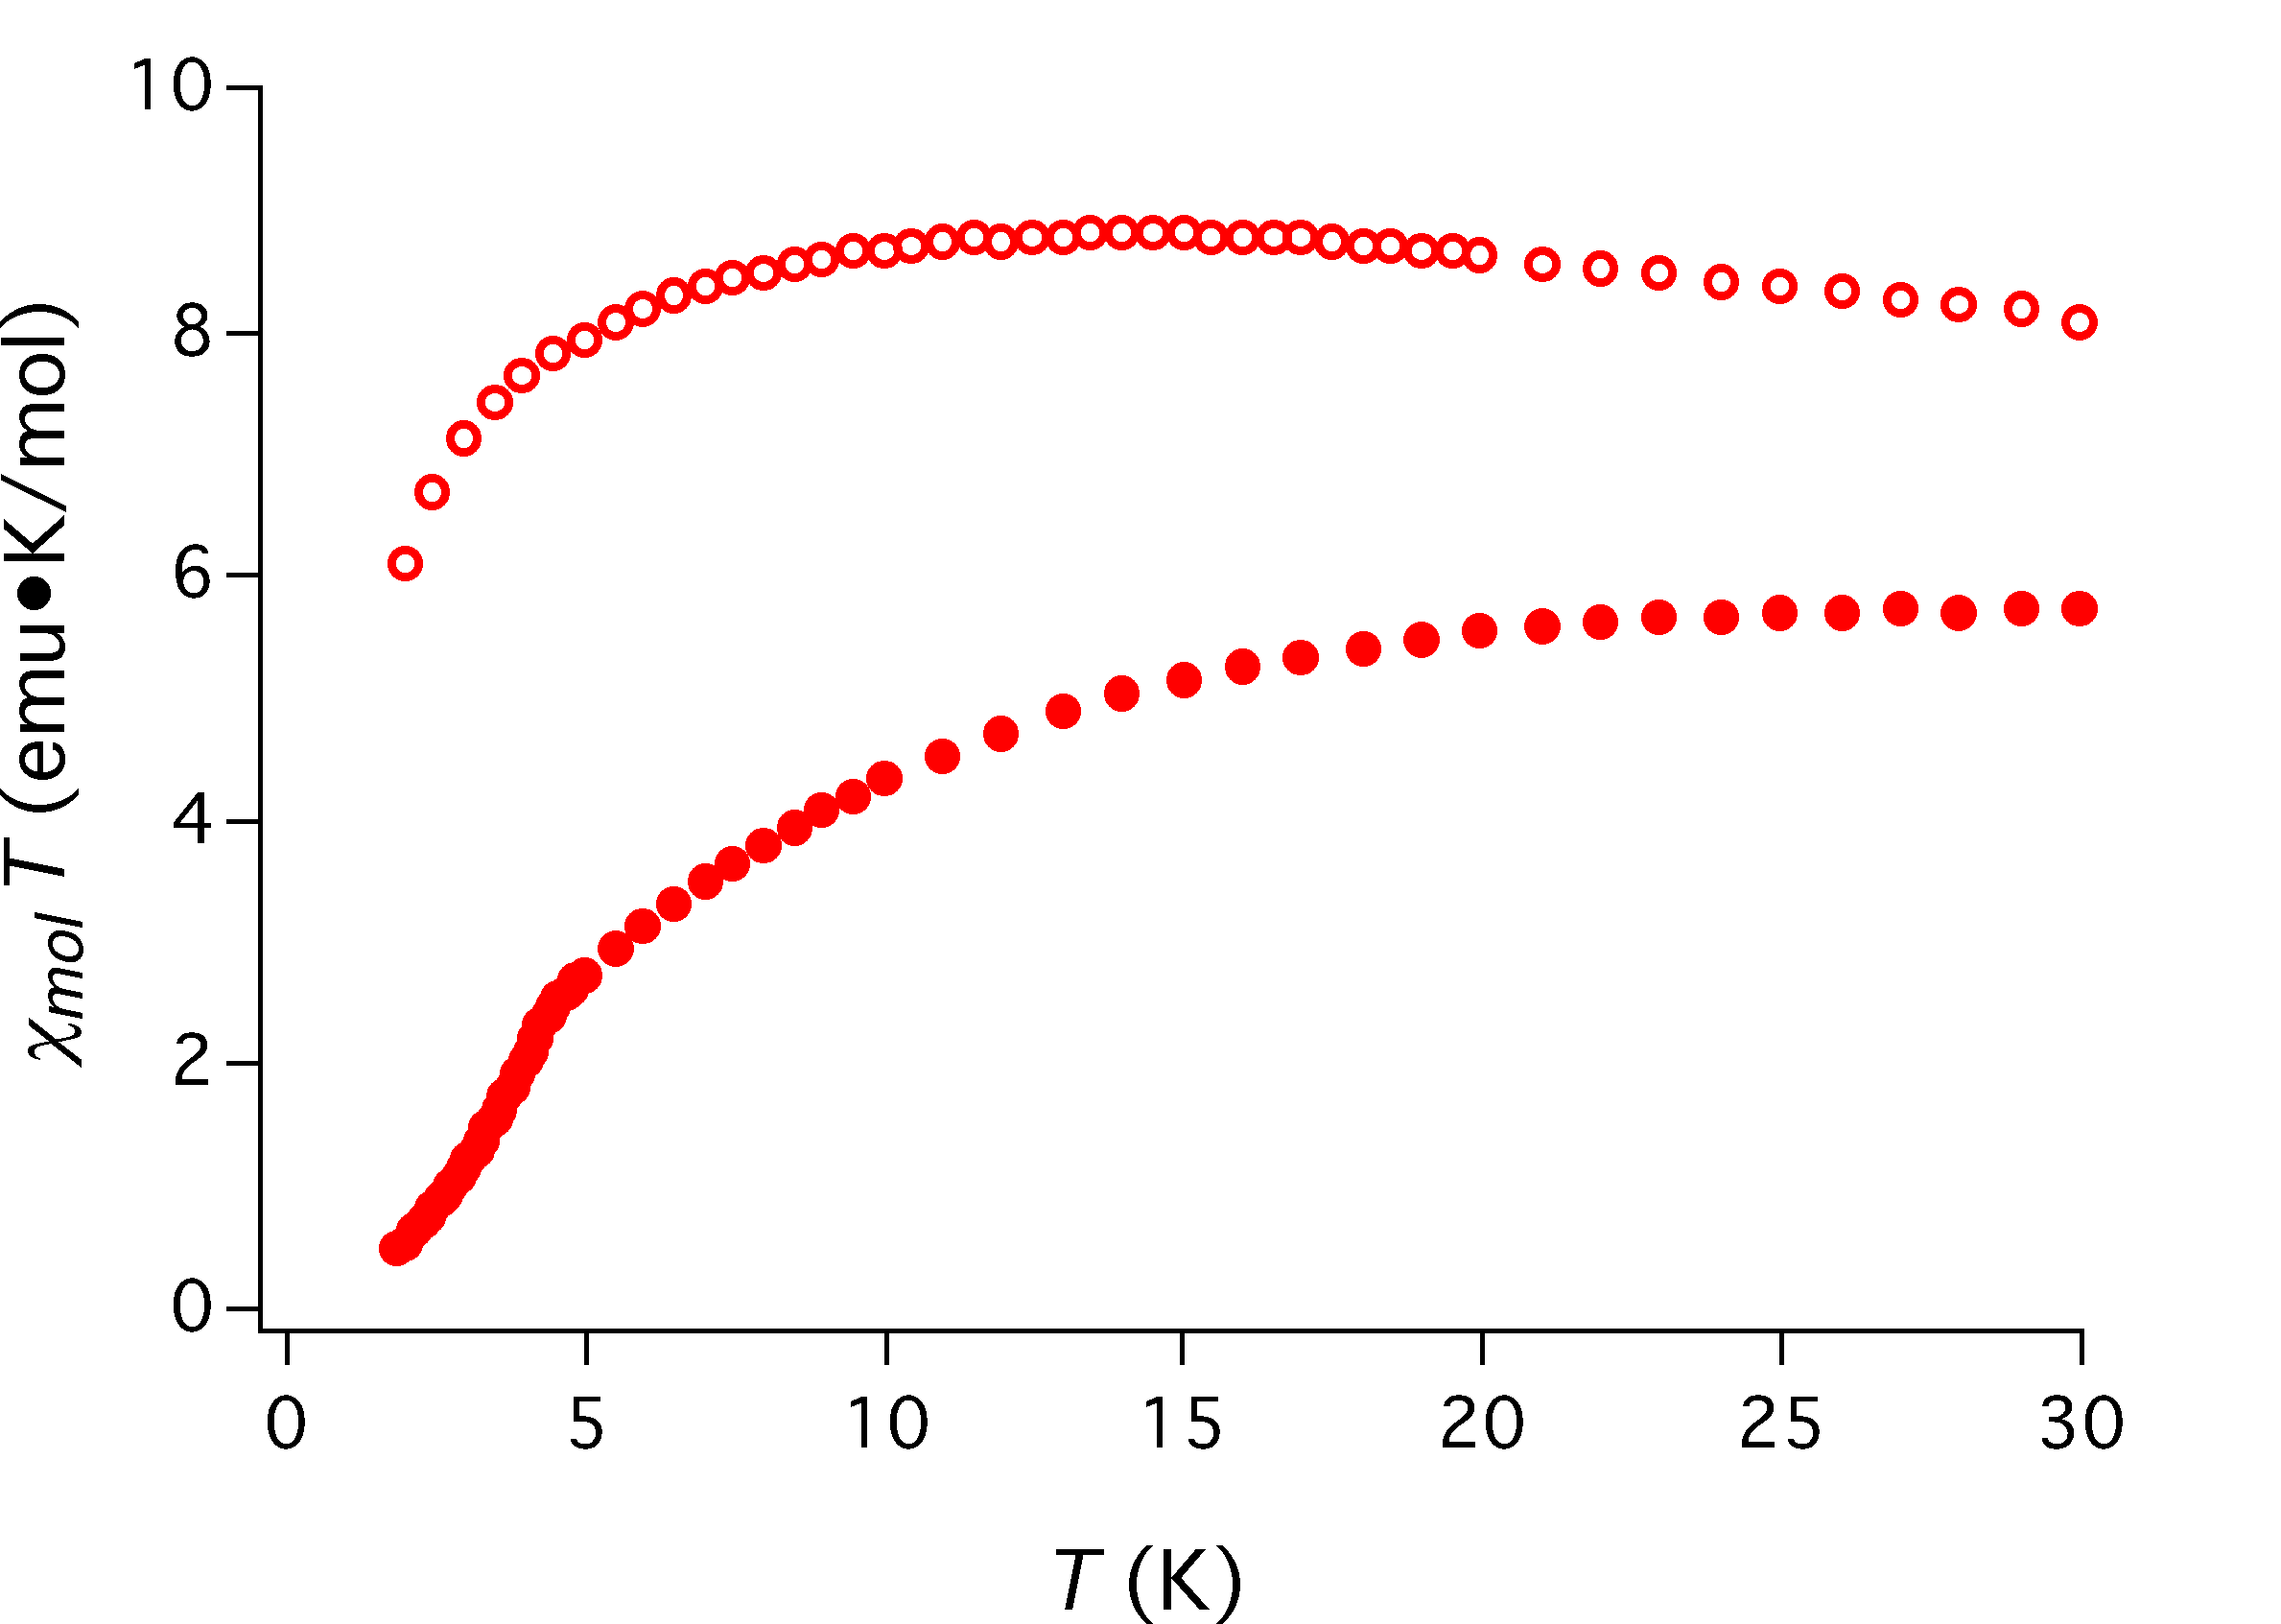


Figure S3. The plot of *’* vs. *”* (Cole-Cole diagram) at 4.2 K for [Co(OCN)2(**4NOPy**)4] in the frozen MTHF solution. The solid lines are least-square fittings of the complex susceptibilities to the Cole-Cole’s semicircle law (equation 1). The parameters (equation 2) obtained from the fitting of data in the ** ‘ vs. *T* plot are listed in below.

*** = *∞* + (*0* – *∞*)/[1 + (*i0*)(1-**)] equation 1

　　　　　　equation 2

| *T*(K) | *∞*(emumol-1) | *0* (emumol-1) | ** (s) | ** |
| --- | --- | --- | --- | --- |
| 4.0 | 0.385 | 2.09 | 0.0805 | 0.20 |
| 4.2 | 0.384 | 1.97 | 0.0445 | 0.16 |
| 4.5 | 0.380 | 1.83 | 0.0180 | 0.14 |
| 5.0 | 0.382 | 1.65 | 0.0054 | 0.09 |


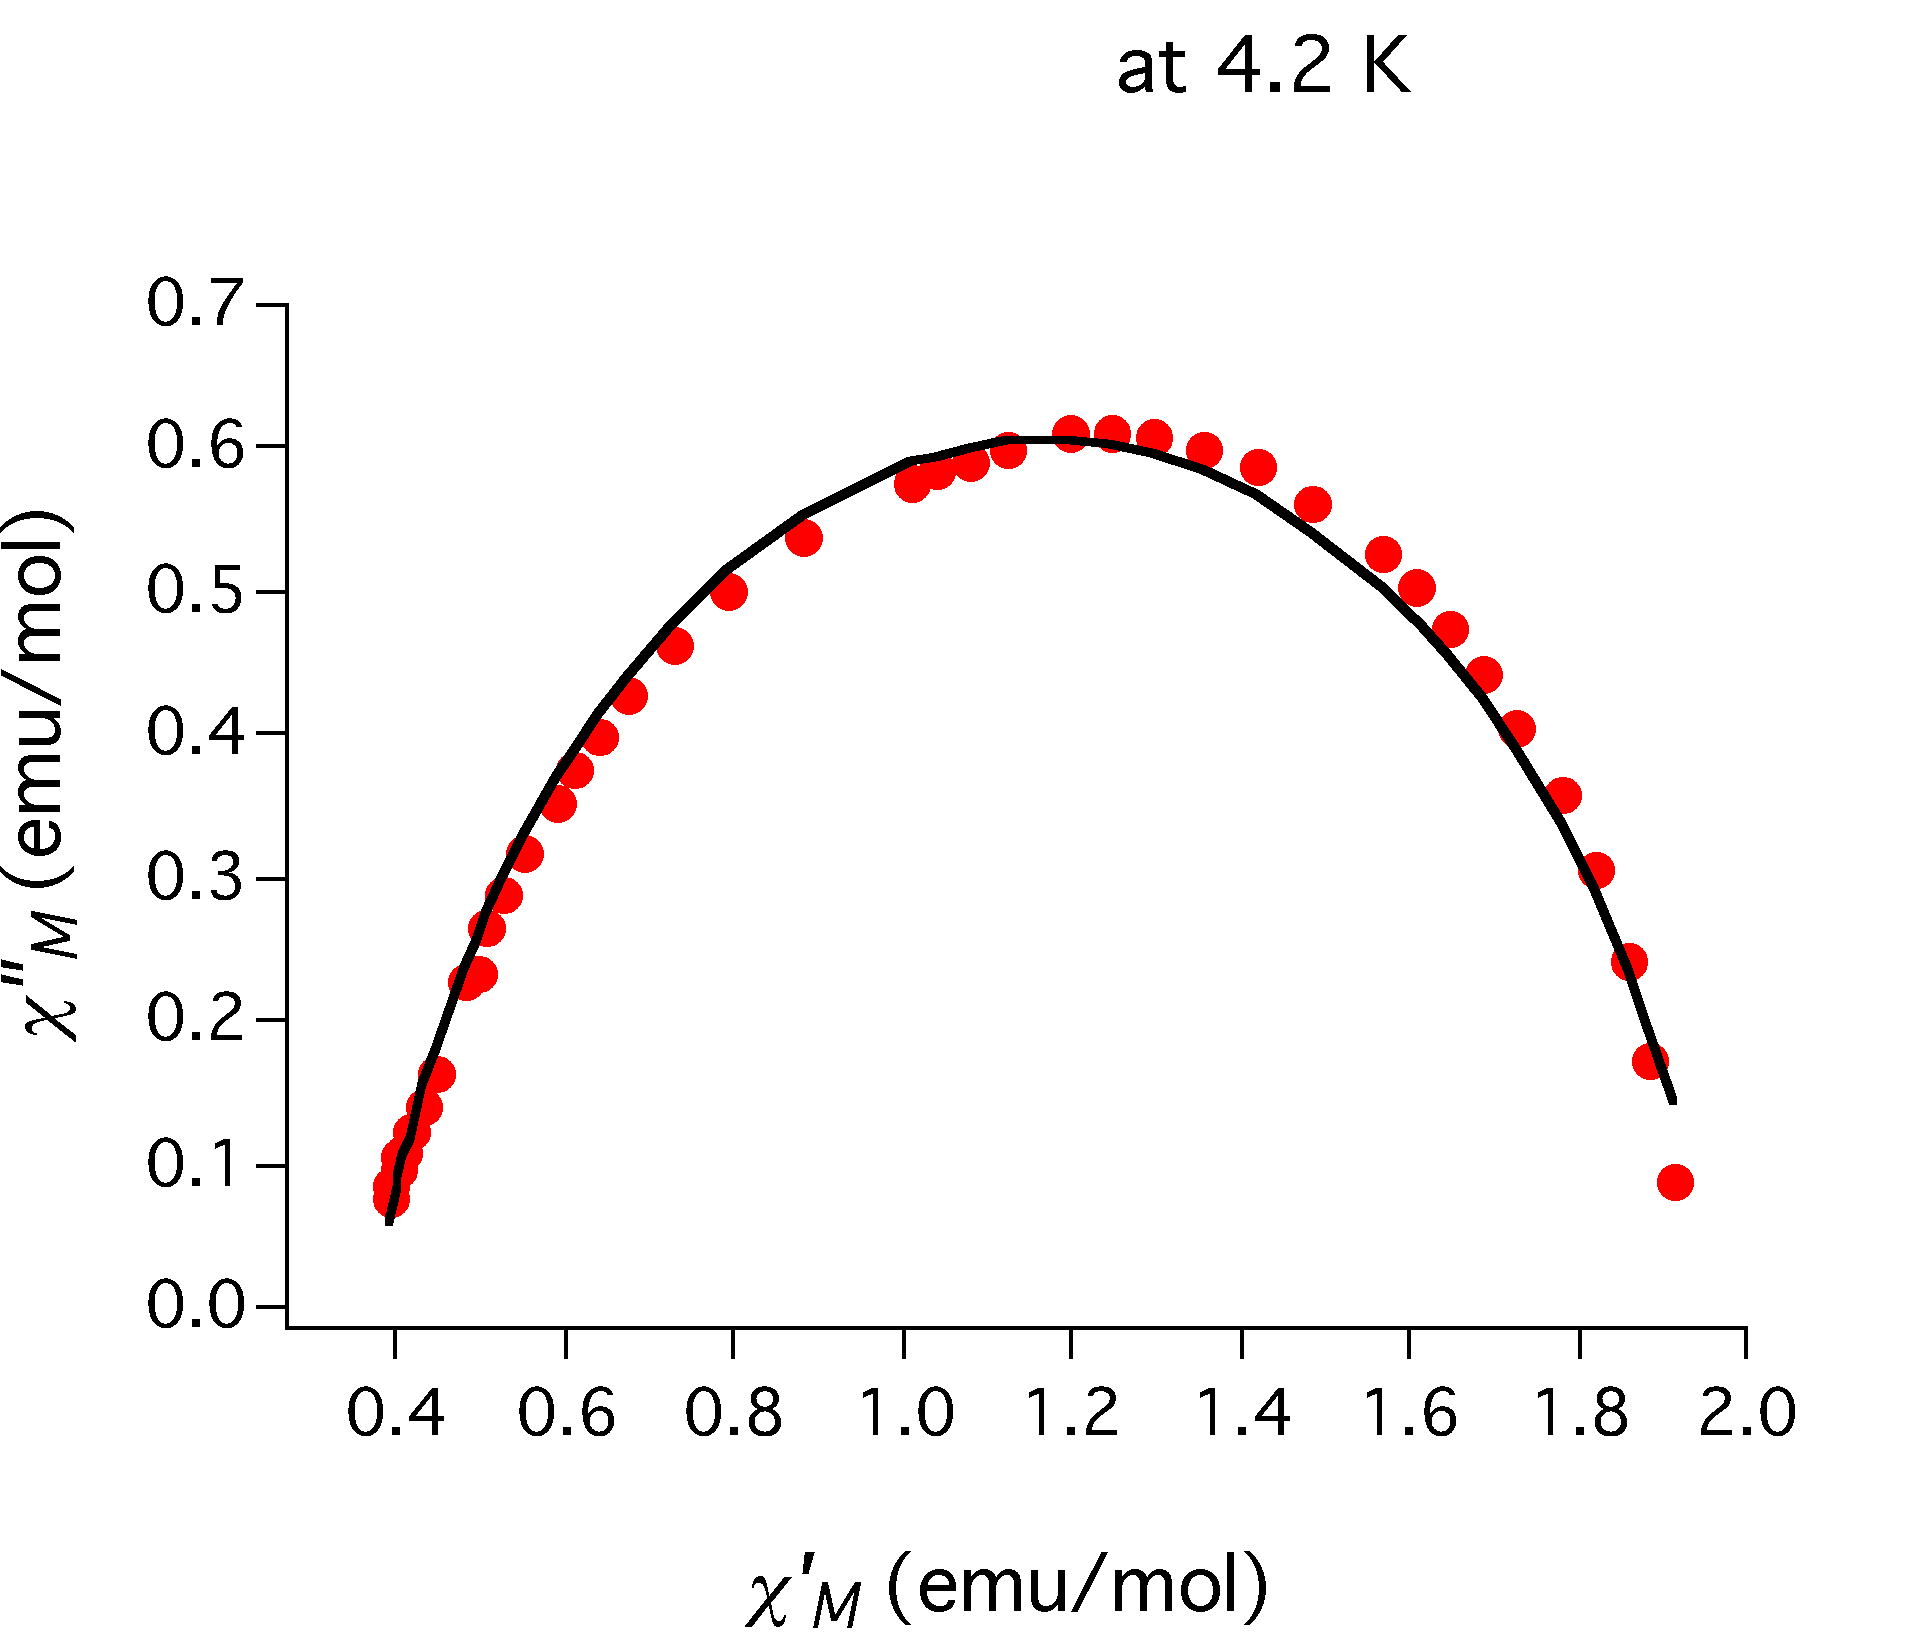


Figure S4. a) *Mmol*/*NB* vs. *H/T* and b) ) *T* vs. *T* plots of Co(OCN)2(**4NOPy**)4 in a frozen MTHF solution. The solid lines are the theoretical curves based on the ligand field theoretical model. c) *E* vs. *Ms* diagram obtained by the optimized parameters.


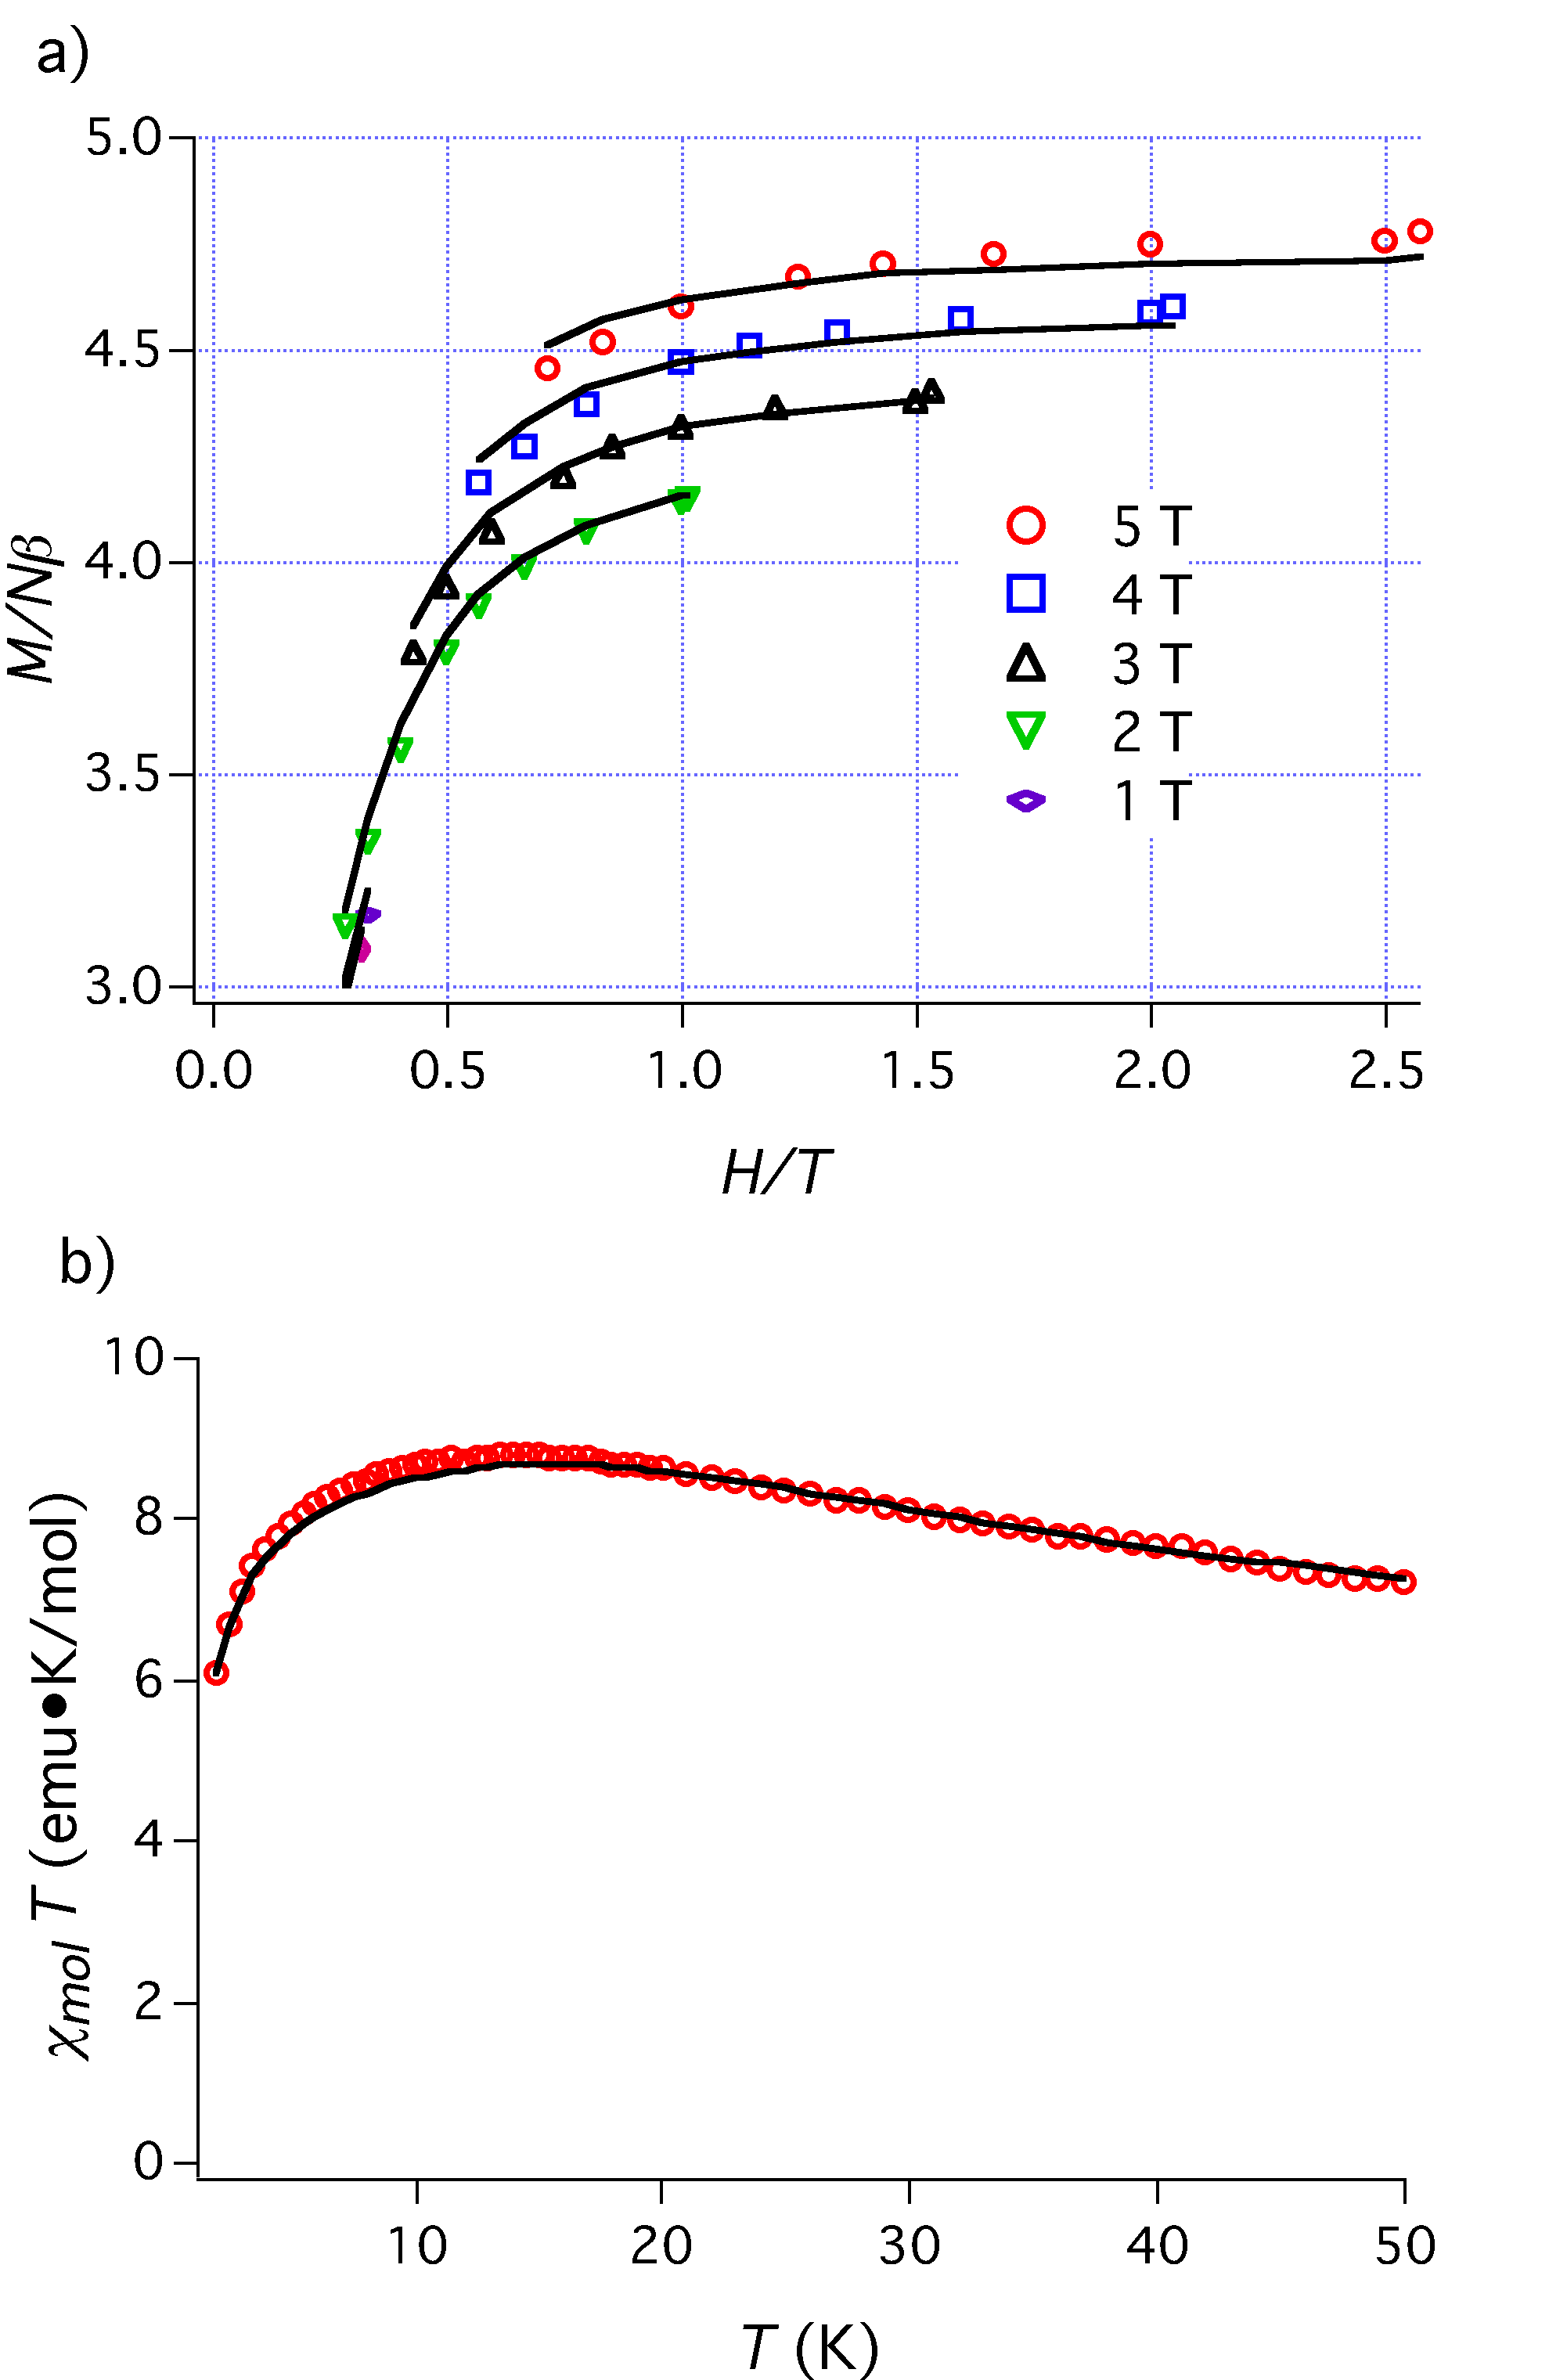


c)

Effective Hamiltonian:

Optimized parameters:

Stevens’ orbital reduction factor: *k* = 1.0 (fixed)

Low-symmetry ligand field: ** */* *k*B = -960 K

*g*-factor for electron spin: *g*e = 2.0023 (fixed)

Spin-orbit coupling: ** */* *k*B = -250 K

Superexchange interaction: *J / k*B = 29.0 K

Theoretical study on the magnetic property of the complex will be discussed in detail elsewhere.

Figure S5. a) *’T* - vs. *T* and b) **” vs. *T* plots for Co(SCN)2(**4NOPy**)4 in a frozen MTHF solution The solid lines are visual guides. The inset shows Arrhenius plot.

a)

b)


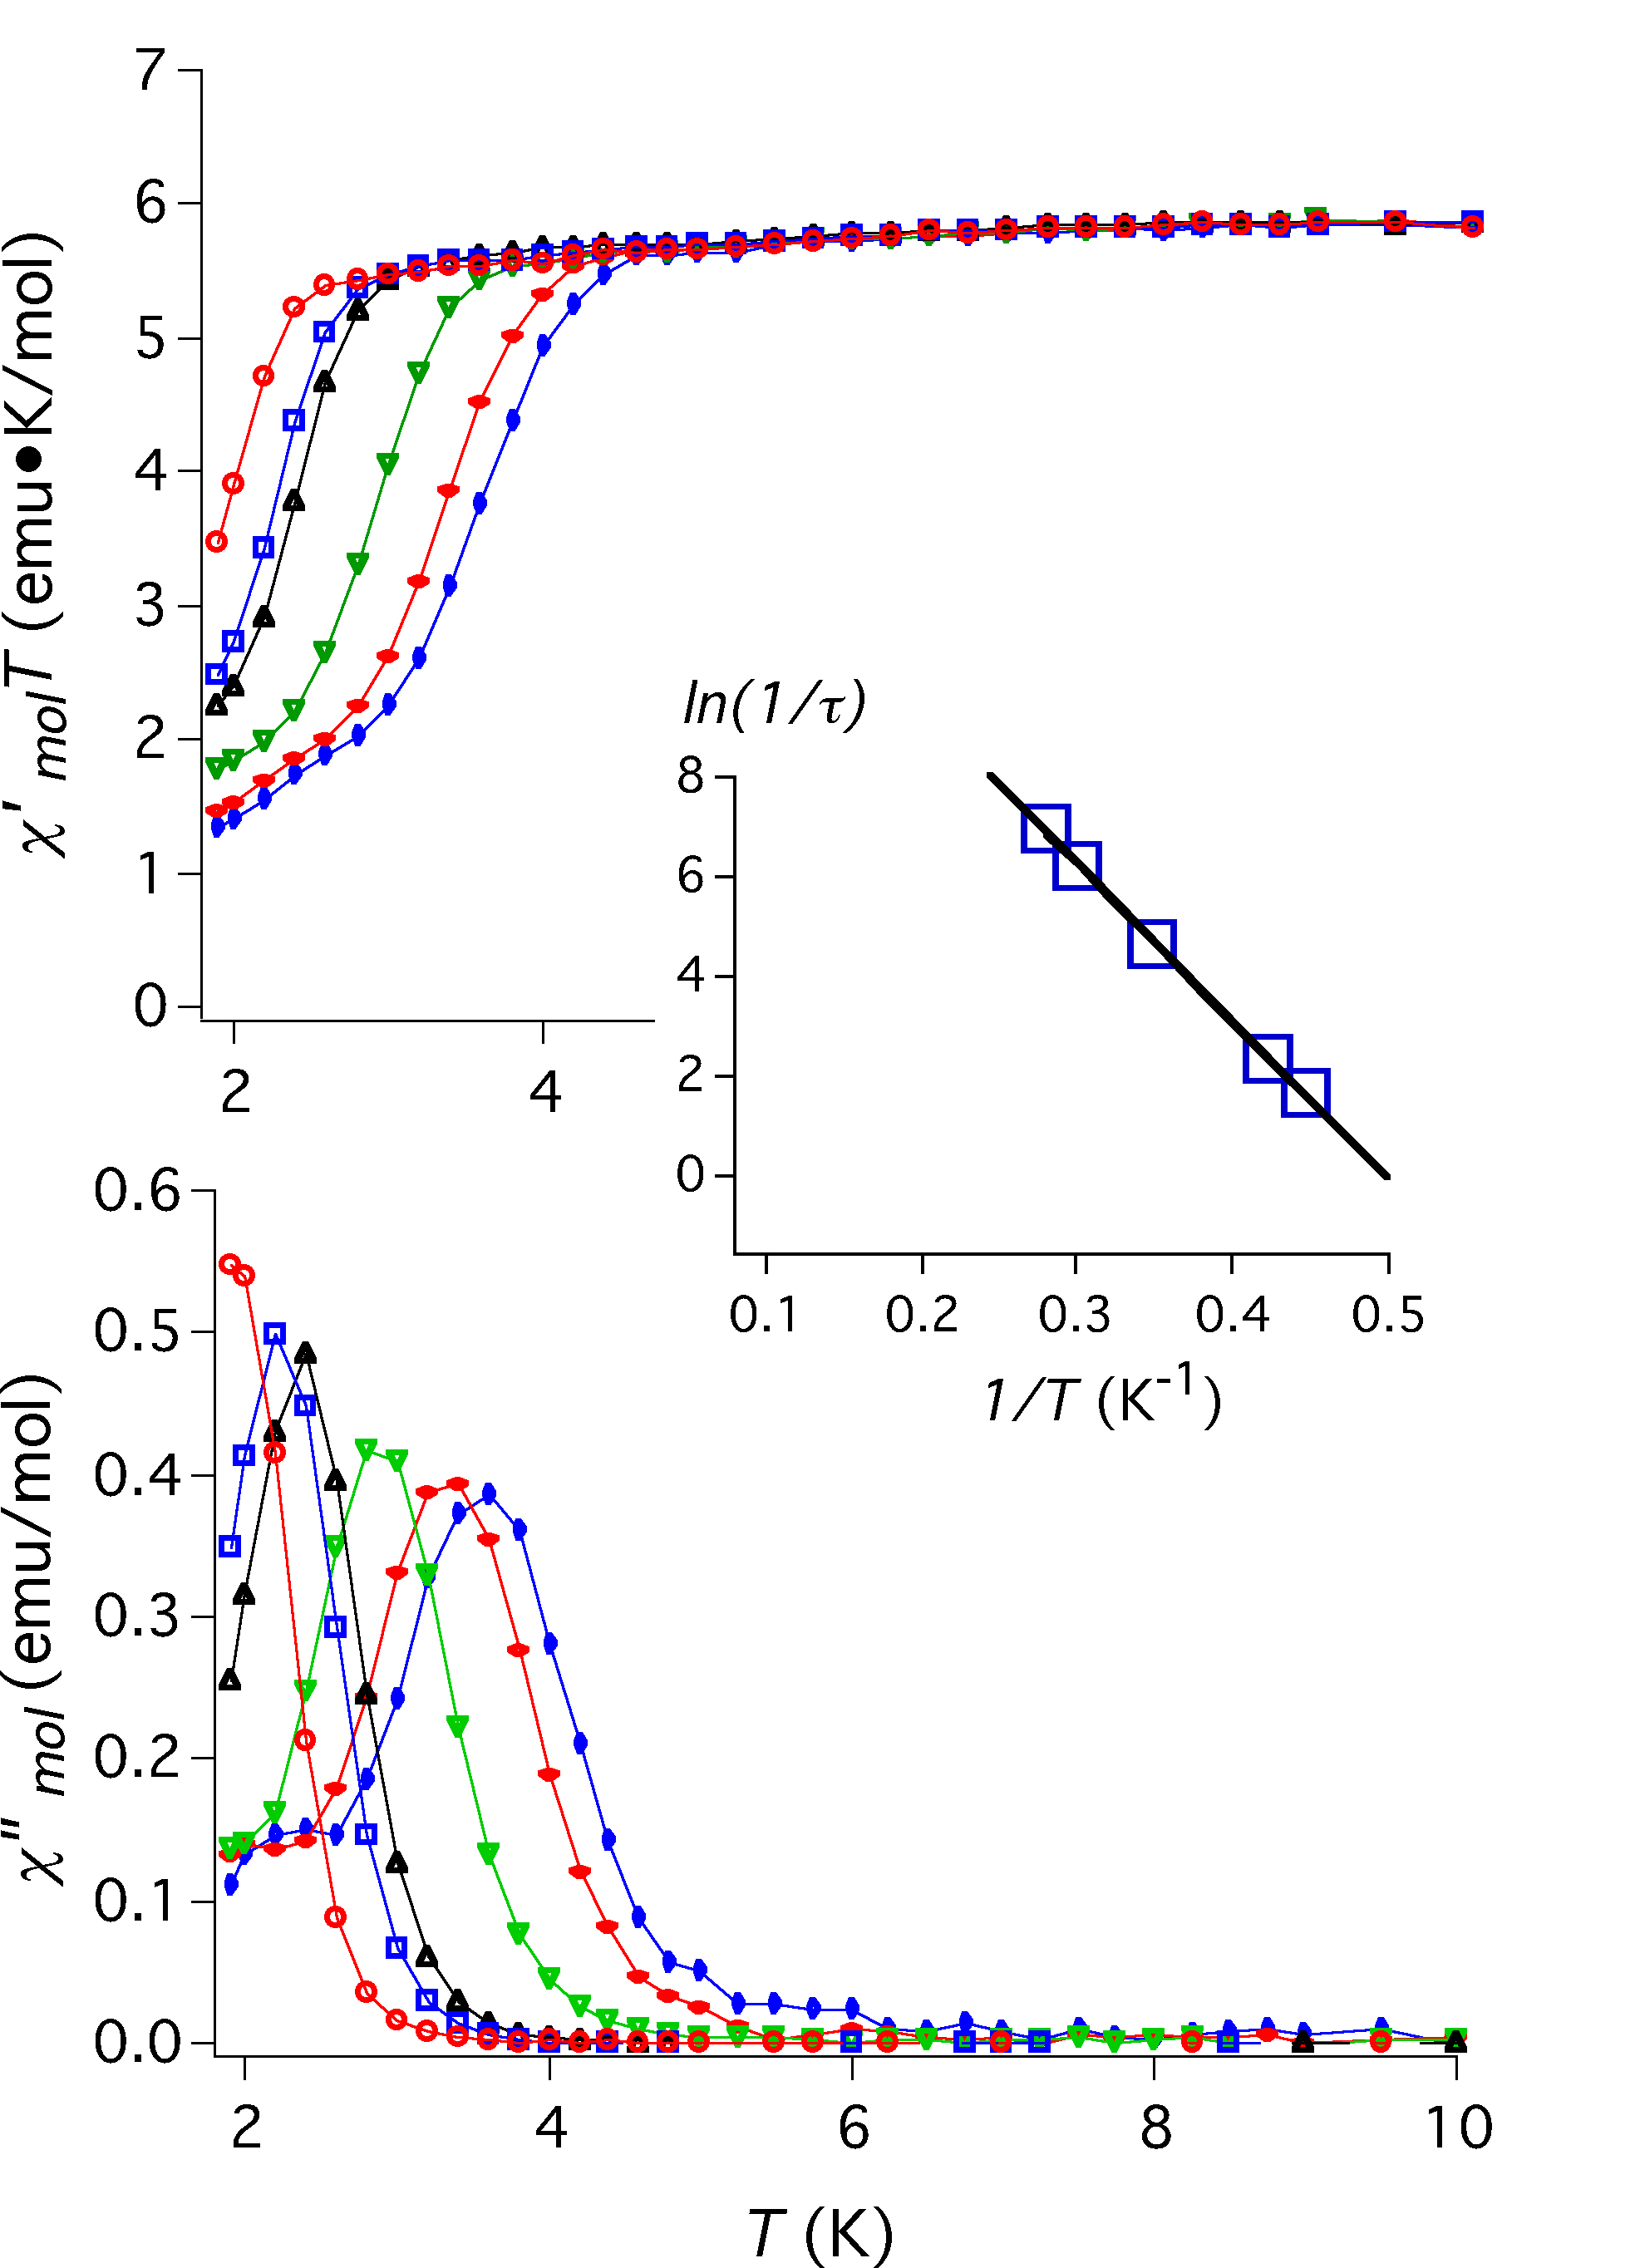

Supplement: b403524k.doc [file b403524k.doc]
